# Supplementary material for: Fabrication of a one-dimensional tube-in-tube polypyrrole/tin oxide structure for highly sensitive DMMP sensor applications
Source: Royal Society of Chemistry journal article supplement (doi:10.1039/c7ta02725g), 2017-01-01
Supplement: c7ta02725g1.pdf [file c7ta02725g1.pdf]

Electronic Supplementary Information (ESI) for

## **Fabrication of a One-dimensional Tube-in-tube Polypyrrole/Tin oxide Structure for Highly Sensitive DMMP Sensor Applications**

**Jaemoon Jun, Jun Seop Lee, Dong Hoon Shin, Jungkyun Oh, Wooyoung Kim, Wonjoo Na, and Jyongsik Jang \***

*School of Chemical and Biological Engineering, College of Engineering, Seoul National University (SNU), 599 Gwanangno, Gwanak-gu, Seoul, 151-742 (Korea). Fax: +82-2-888-7295; Tel: 82-2-880-8348; e-mail: [jsjang@plaza.snu.ac.kr](mailto:jsjang@plaza.snu.ac.kr)*

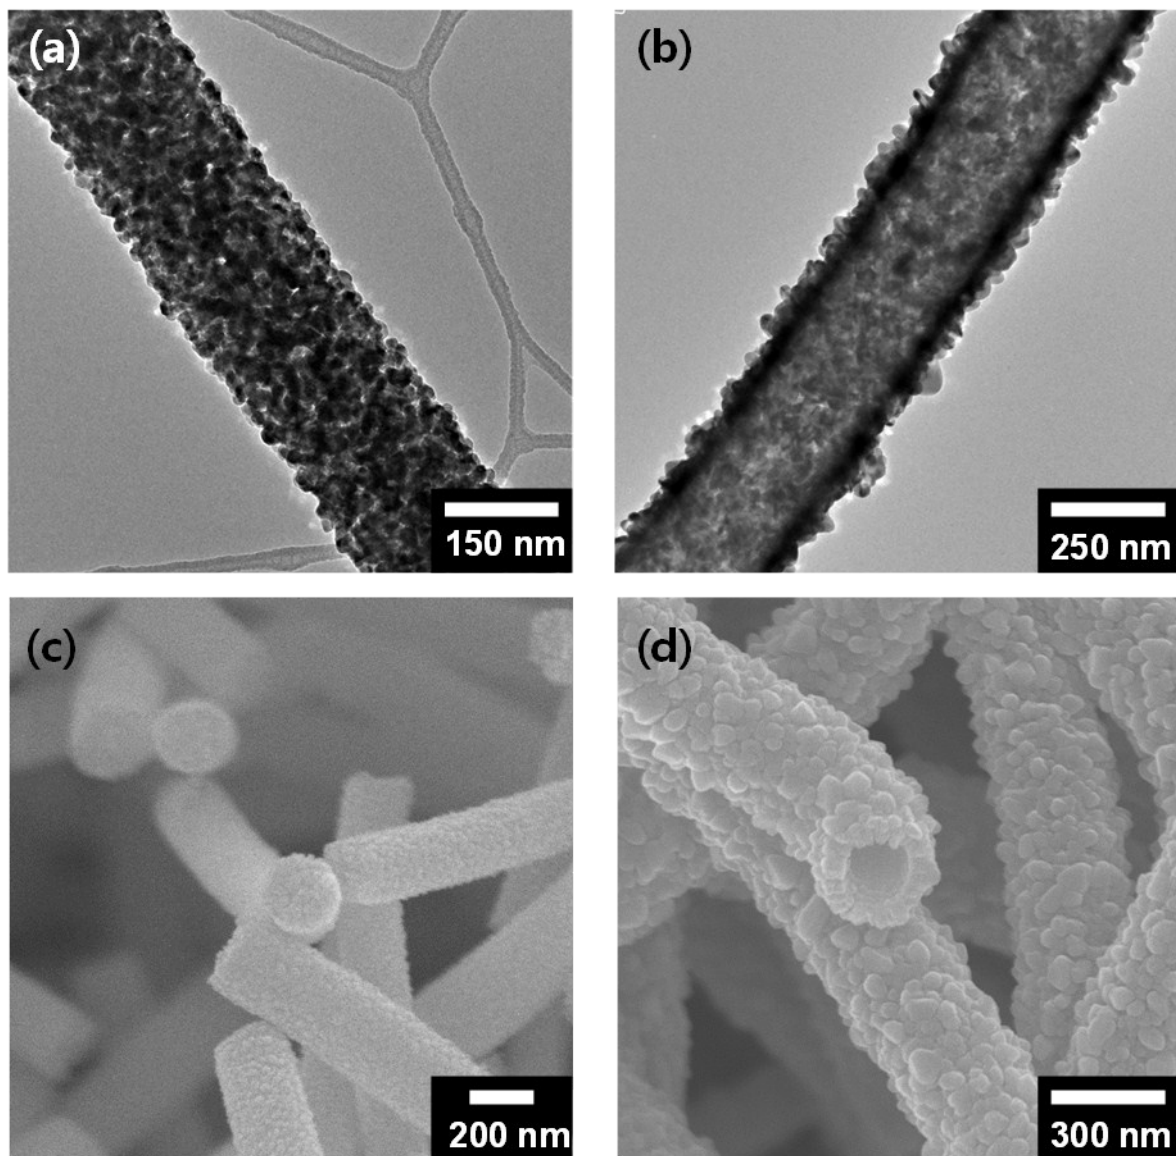

**Fig. S1.** (a, c) Transmission electron microscopy (TEM) and scanning electron microscopy (SEM) images of the SnO<sub>2</sub> fibers. (b, d) TEM and SEM images of the SnO<sub>2</sub> tubes.

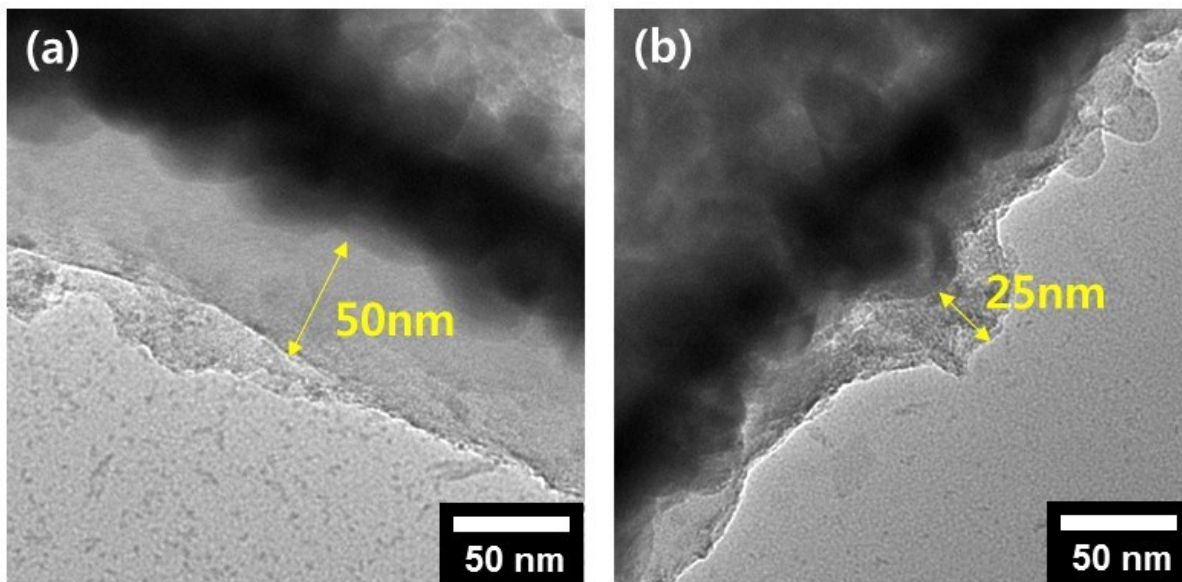

**Fig. S2.** Transmission electron microscopy (TEM) images of the PPy@SnO<sub>2</sub> tube in tube by conducting the VDP step at different temperature (a)60°C and (b)100°C.

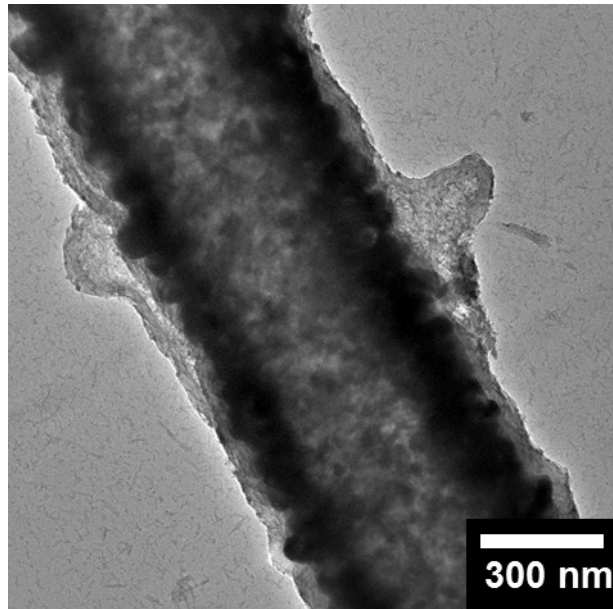

**Fig. S3.** TEM image of the morphology of the PPY coated SnO<sub>2</sub> tube structure after VDP method in ambient state.

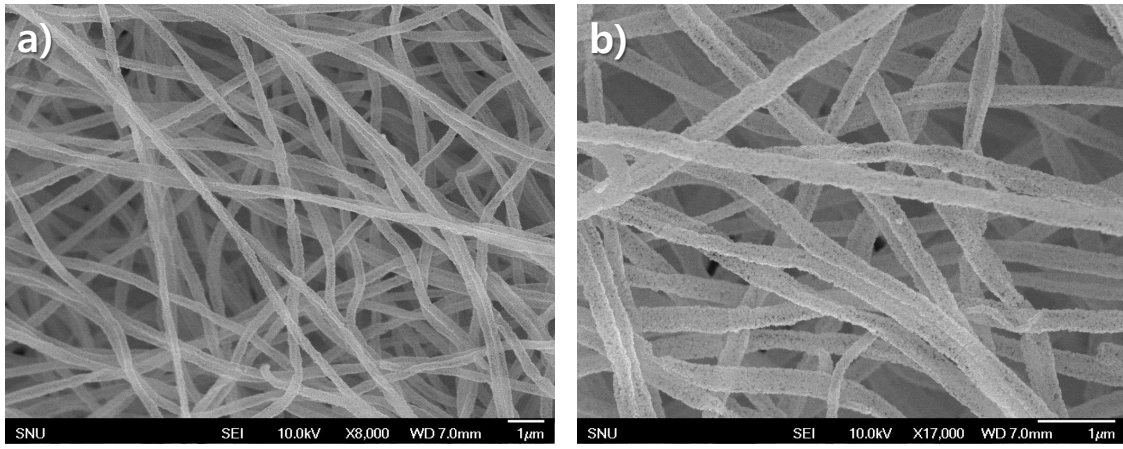

**Fig. S4.** (a) Low-and (c) high-resolution FE-SEM images of the tube-in-tube SnO<sub>2</sub>.

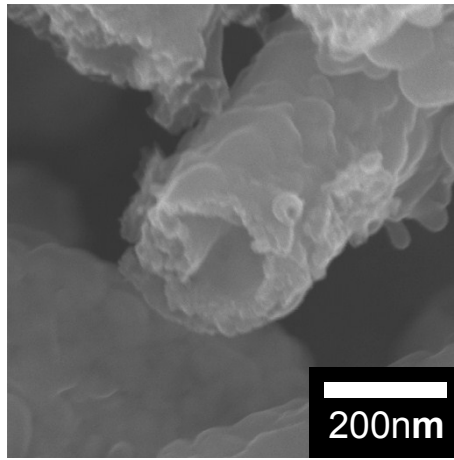

**Fig. S5.** High-resolution SEM image of the PPy@SnO<sub>2</sub> tube in tube.

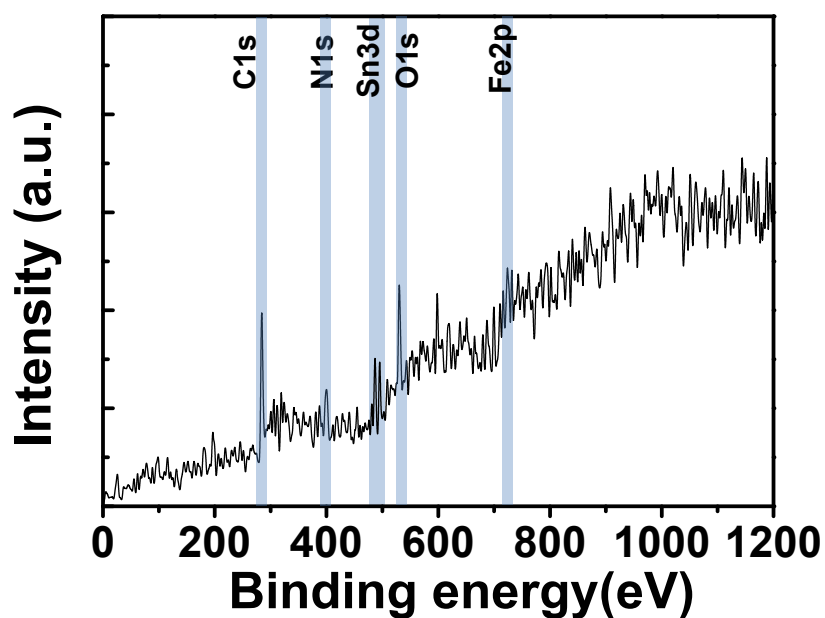

**Fig. S6.** . X-ray photoelectron spectroscopy (XPS) analysis of a fully scanned spectra (0–1200 eV).

Fig.S6 shows the overall XPS spectroscopy of the PPy@SnO<sub>2</sub> tube in tube over the range of 0-1200eV; carbon, nitrogen, oxygen, tin, and iron atoms were present. Based on the XPS peak, it is considered that the small quantities of iron atom originated from FeCl<sub>3</sub> solution is still exist.

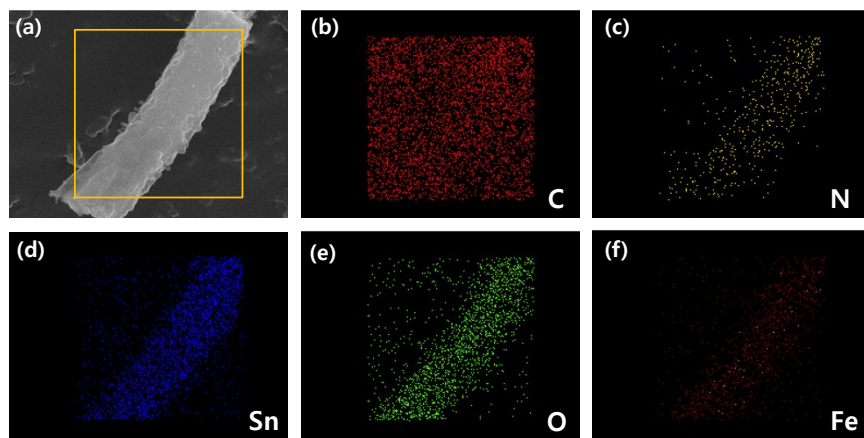

**Fig. S7.** EDS dot mapping of PPy@SnO<sub>2</sub> tube in tube surface components indicating (a) overall SEM image, (b) carbon, (c) nitrogen, (d) tin, (e) oxygen and (f) iron

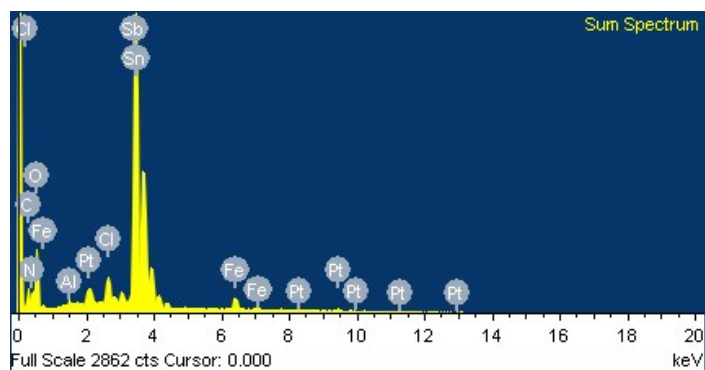

**Fig. S8.** EDX spectrum of the PPy@SnO<sub>2</sub> tube in tube surface

**Table S1.** Summarized elemental distribution of the PPy@SnO<sub>2</sub> tube in tube

| Element | Weight% | Atomic% |
|---------|---------|---------|
| CK      | 5.42    | 14.30   |
| NK      | 5.64    | 12.77   |
| OK      | 27.71   | 54.94   |
| AlK     | 0.31    | 0.36    |
| ClK     | 1.50    | 1.35    |
| FeK     | 2.15    | 1.22    |
| SnL     | 51.54   | 13.77   |
| SbL     | 3.66    | 0.95    |
| PtM     | 2.07    | 0.34    |



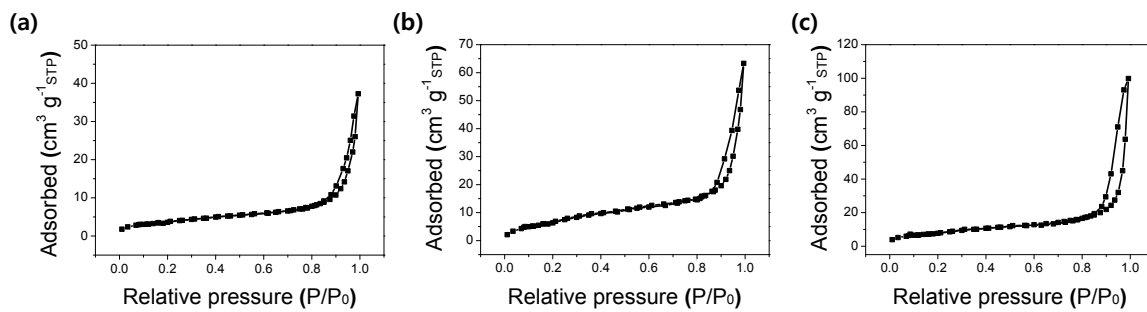

**Fig. S9.** Nitrogen adsorption–desorption isotherm curves of (a) Fiber, (b) Tube, and (c) Tube-in-tube.

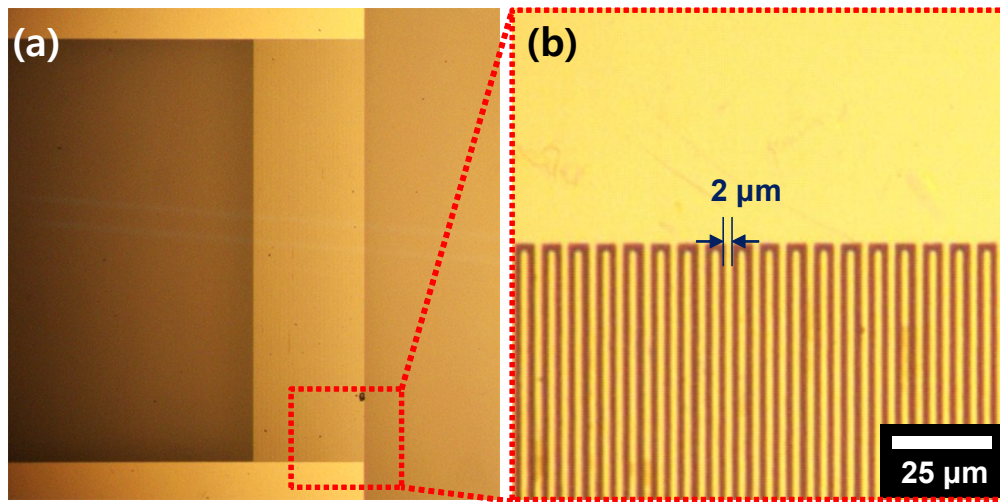

**Fig. S10.** (a) Low- and (b) high-resolution optical microscopy images of the interdigitated array (IDA) electrode.

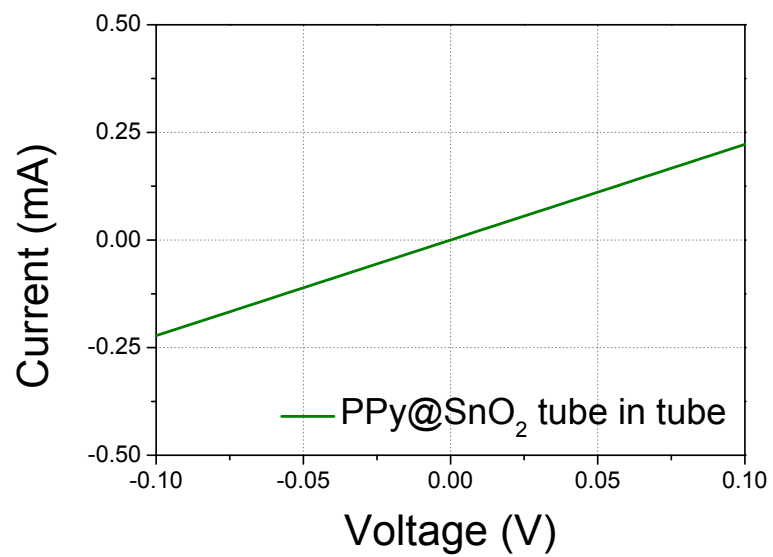

**Fig. S11.** Current–voltage ( $I-V$ ) curve of the tube-in-tube PPy@SnO<sub>2</sub> sensor electrode.

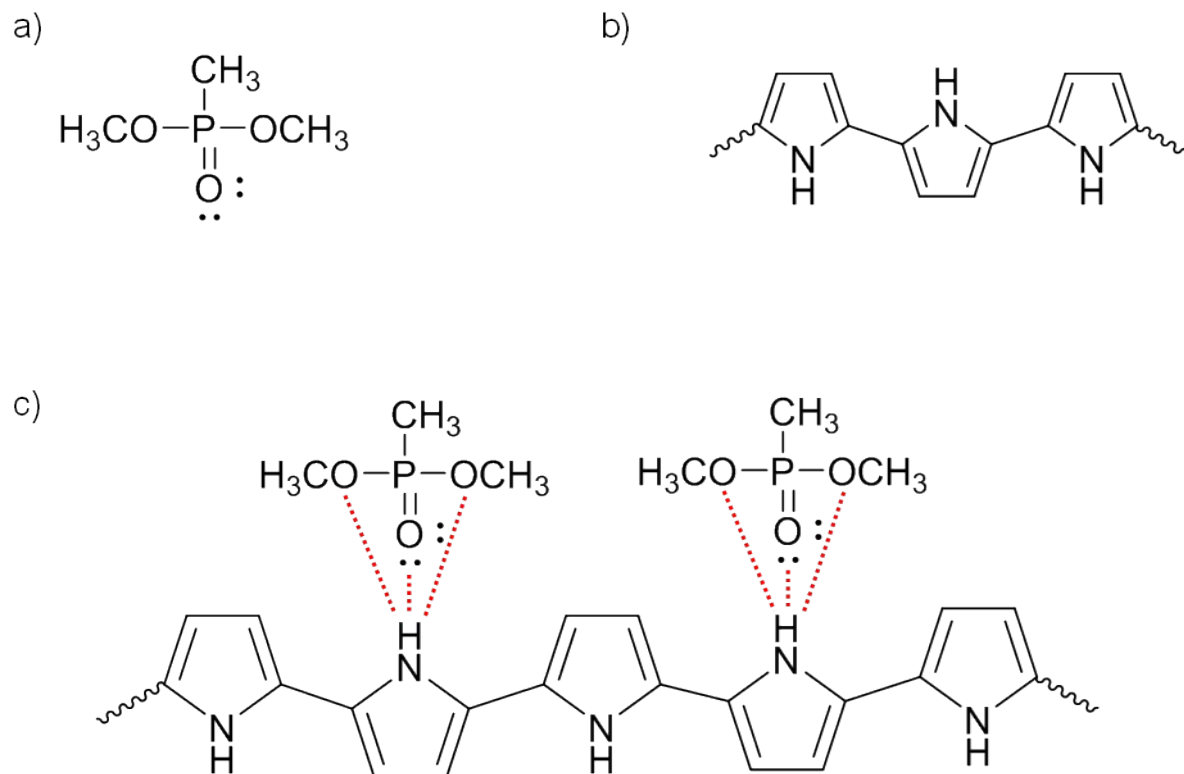

**Fig. S12.** Molecular structures of (a) dimethyl methylphosphonate (DMMP) and (b) polypyrrole (PPy).  
 (c) Schematic diagram describing the effect of hydrogen bonding on PPy.

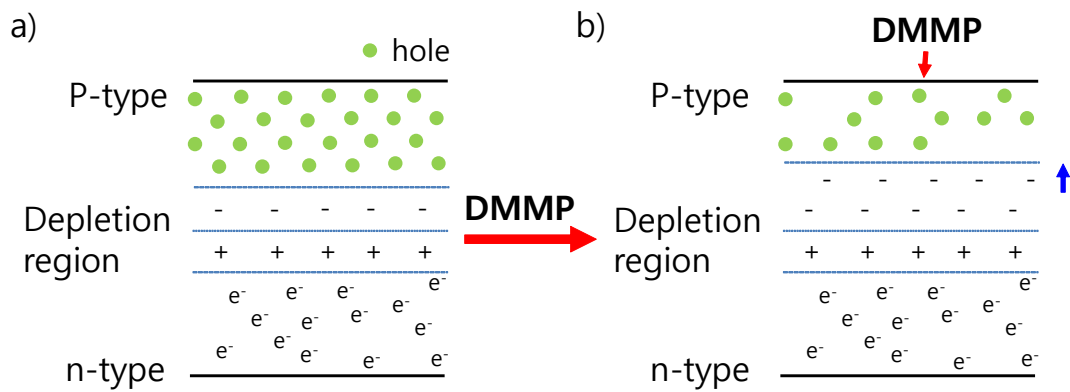

**Fig. S13.** Schematic diagram of the formation of a p-n junction.

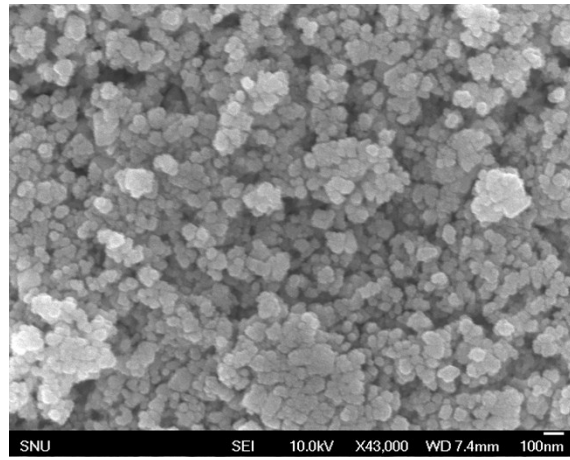

**Fig. S14.** SEM image of the PPy@SnO<sub>2</sub> nanoparticles.

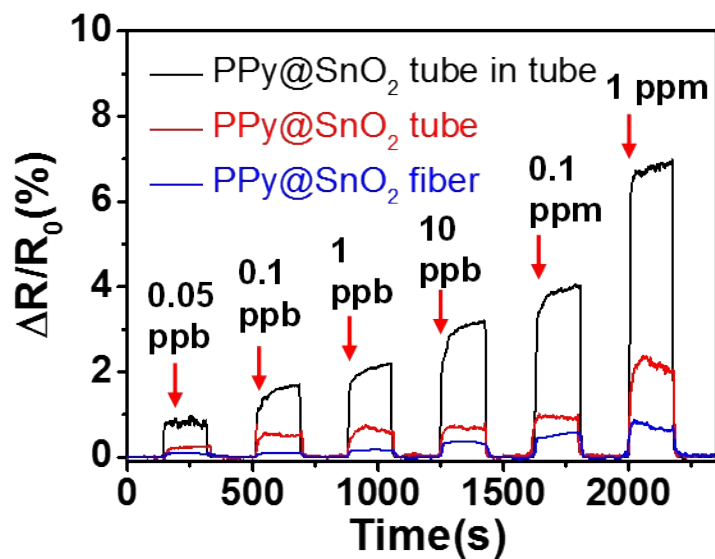

**Fig. S15.** Real-time monitoring of PPy@SnO<sub>2</sub> having different one-dimensional (1D) structures after sequential exposure to DMMP.

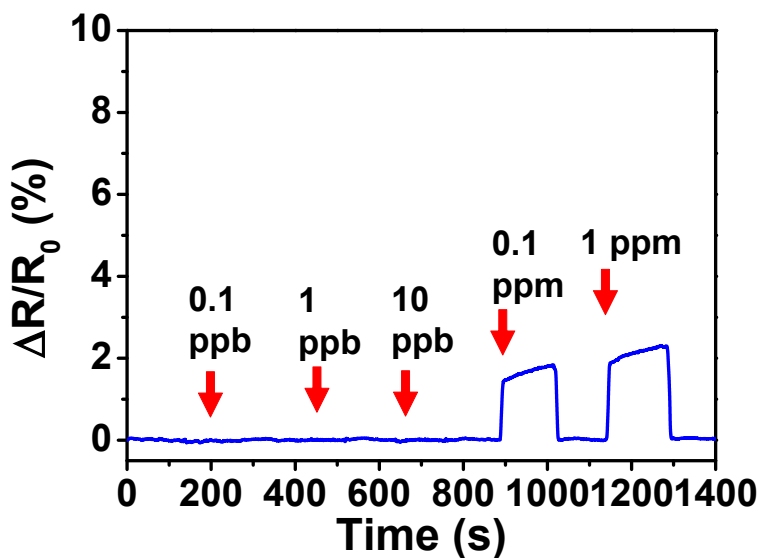

**Fig. S16.** Real-time responses of the PPy@SnO<sub>2</sub> nanoparticles upon periodic exposure to dimethyl methylphosphonate (DMMP); 0.1 ppb to 1 ppm.

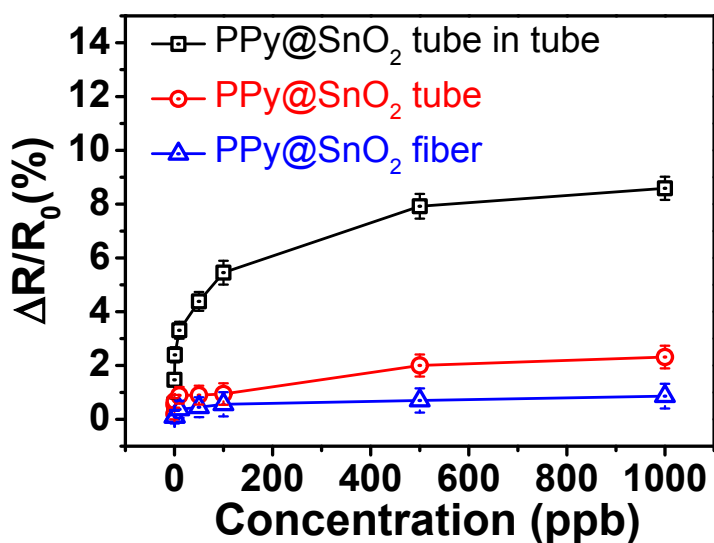

**Fig. S17.** Changes in sensitivity as a function of DMMP concentration calculated from the real-time responses.

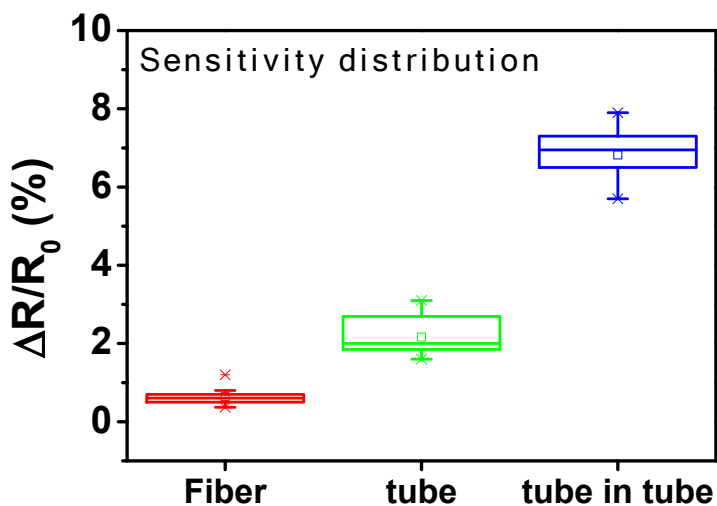

**Fig. S18.** Variation and comparison of the sensitivity parameter. These parameters were evaluated from 10 devices fabricated at 1 ppm
